# Supplementary material for: Colorectal anticancer activity of a novel class of triazolic triarylmethane derivatives
Source: Royal Society of Chemistry journal article supplement (doi:10.1039/d3md00467h), 2023-12-04

## Colorectal anti-cancer activity of a novel class of triazolic triarylmethanes derivatives

Ameni Hadj Mohamed <sup>[a]</sup> <sup>[b]</sup>, Aline Pinon <sup>[c]</sup>, Nathalie Lagarde <sup>[a]</sup>, Christophe Ricco <sup>[a]</sup>, Elizabeth Goya-Jorge <sup>[d]</sup>, Hadley Mouhsine <sup>[e]</sup>, Moncef Msaddek <sup>[b]</sup>, Bertrand Liagre\* <sup>[c]</sup>, Maité Sylla-Iyarreta Veitía\* <sup>[a]</sup>

a. Laboratoire Génomique, Bioinformatique et Chimie Moléculaire (GBCM, EA 7528) Conservatoire national des arts et métiers, HESAM Université, 2 rue Conté, 75003, Paris

b. Laboratoire de Chimie hétérocyclique, produits naturels et réactivité (LR11ES39) Université de Monastir Avenue de l'environnement 5019, Monastir, Tunisie

c. Univ. Limoges, LABCiS, UR 22722, Faculté de Pharmacie, F-87000 Limoges, France.

d. Laboratory of Immunology-Vaccinology, Faculty of Veterinary Medicine - FARA, University of Liège, Av. Cureghem 10, 4000 Liège, Belgium

e. Peptinov, Pépinière Paris Santé Cochin, Hôpital Cochin, 29 rue du Faubourg Saint Jacques Paris 75014

Corresponding authors: Pr. M. Sylla-Iyarreta Veitía, [maite.sylla@lecnam.net](mailto:maite.sylla@lecnam.net)

Pr. B. Liagre, [bertrand.liagre@unilim.fr](mailto:bertrand.liagre@unilim.fr)

---

## Cytotoxicity evaluation

80% confluent L929 cells were plated in flat bottom plates at  $4 \times 10^5$  cells per well in 100  $\mu\text{L}$  of DMEM medium containing 10% FBS, 2 mM L-Glutamine, 100 U/ml Penicillin - 100  $\mu\text{g}/\text{mL}$  Streptomycin (complete medium) and incubated for one night at 37 °C, 5%  $\text{CO}_2$ . Serial dilutions of compounds (from 100  $\mu\text{M}$  to 0.78  $\mu\text{M}$ ) diluted in complete medium containing 0.5 % DMSO were added to the wells and incubated for 24 hours. Supernatants were discarded and 100  $\mu\text{L}$  of MTT at 0.5 mg/mL were added to the wells. After 2 hours, supernatants were discarded and 200  $\mu\text{L}$  of DMSO were added. Plates were read at 570 nm with a spectrophotometer providing the optical density (OD) of each well and percentages of survival were calculated for each well using the formula:

$$\text{Percentage of survival} = \frac{OD_{\text{compound}}}{OD_{\text{negative control}}} \times 100$$

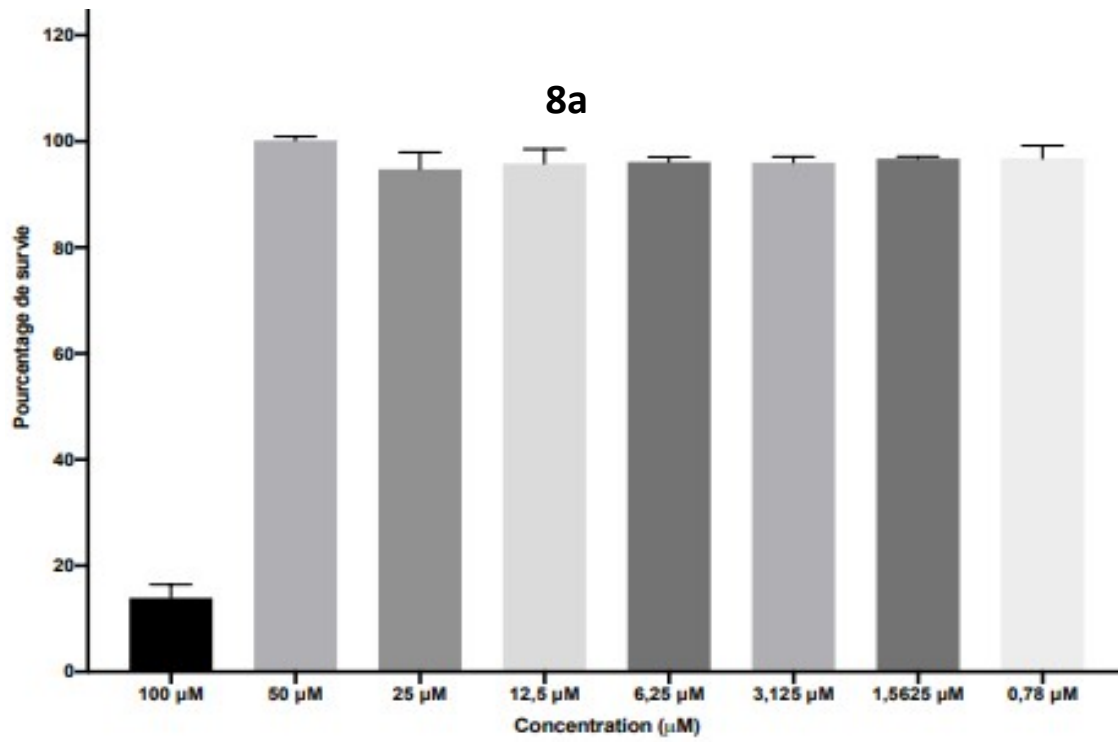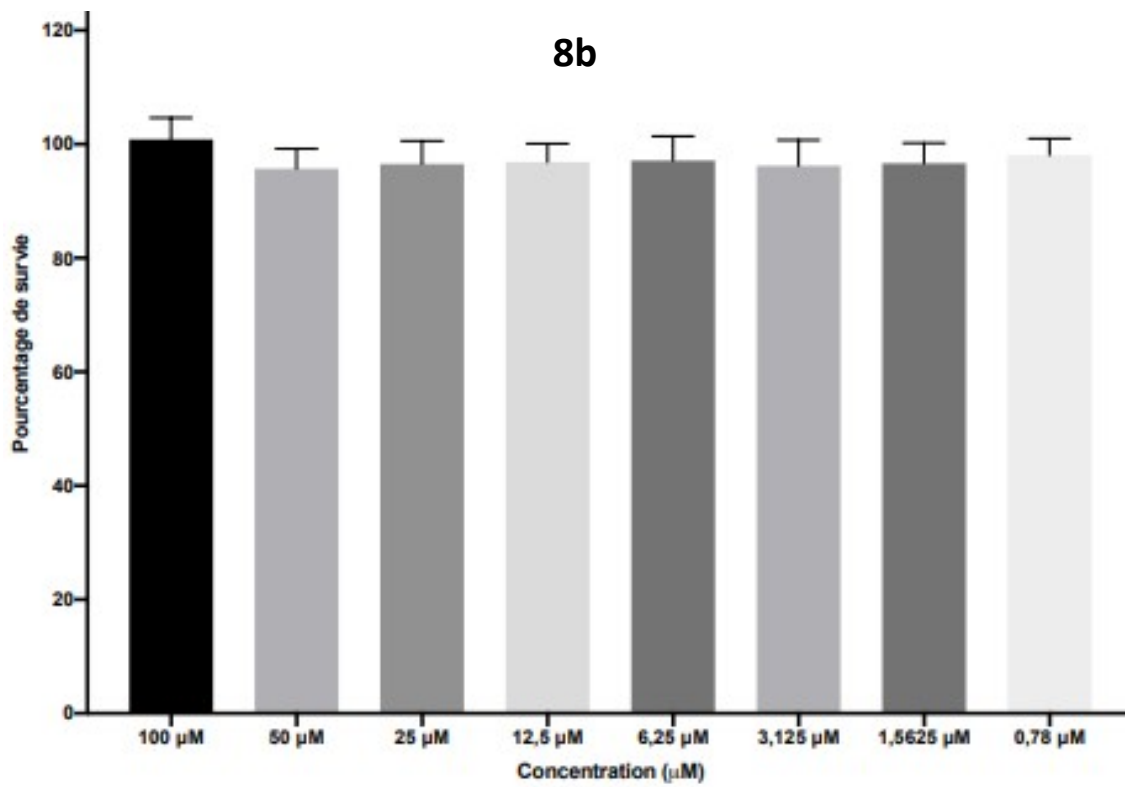

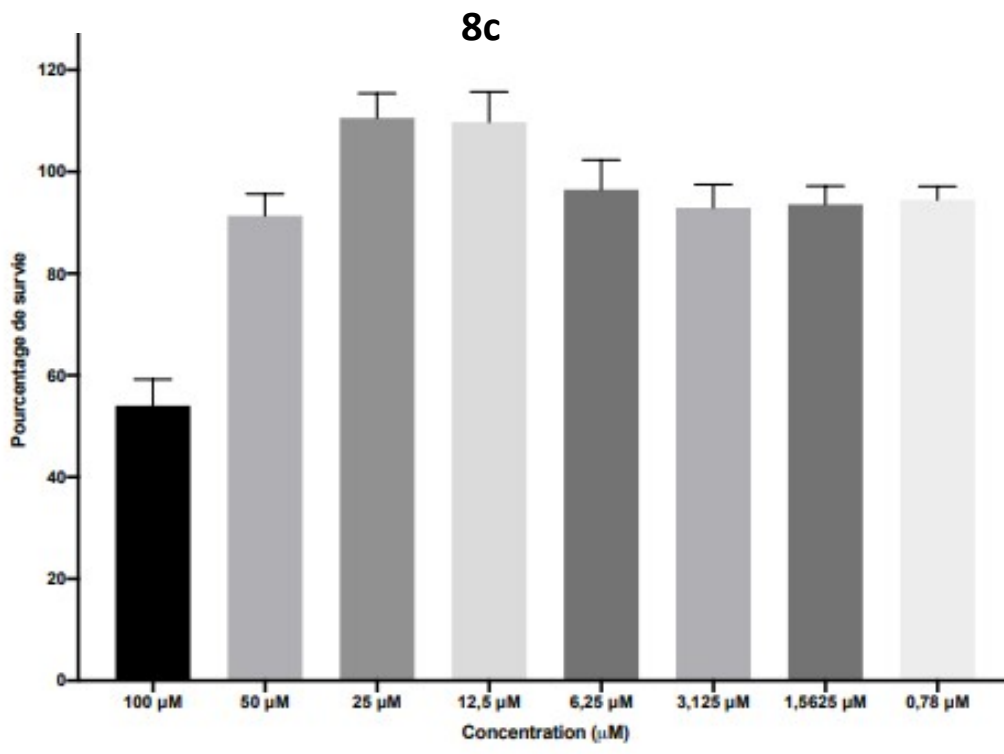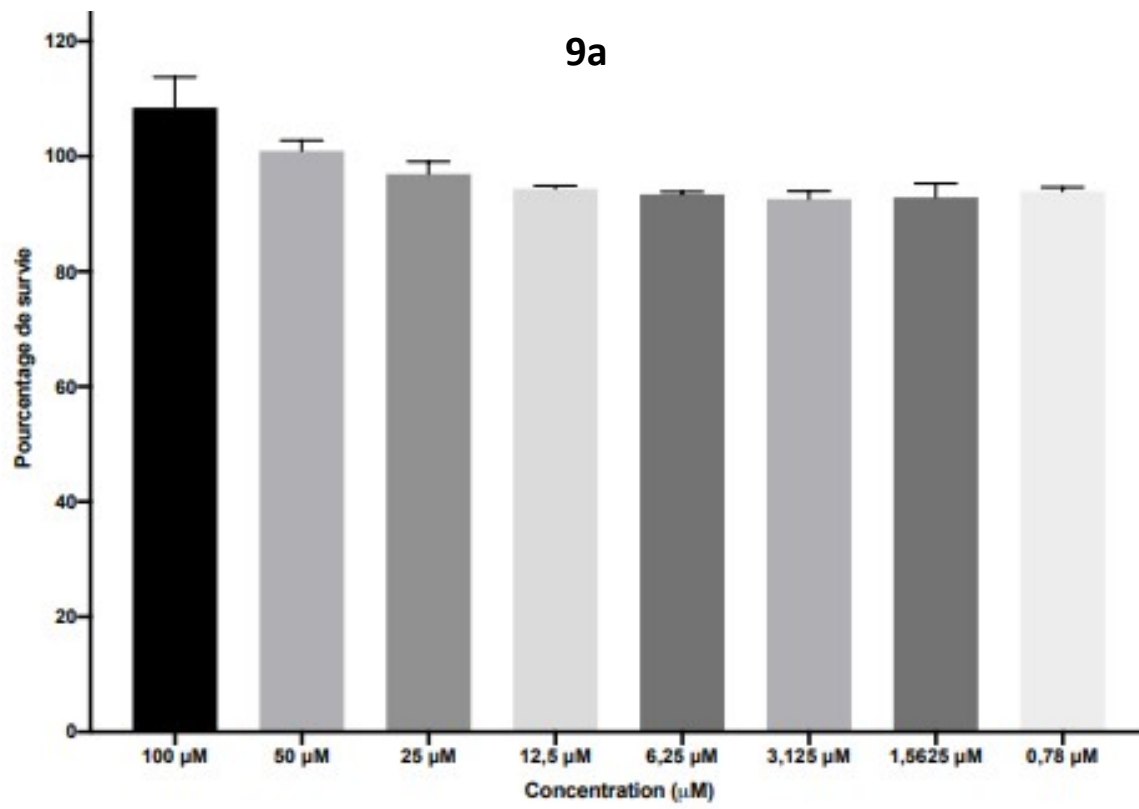

9b

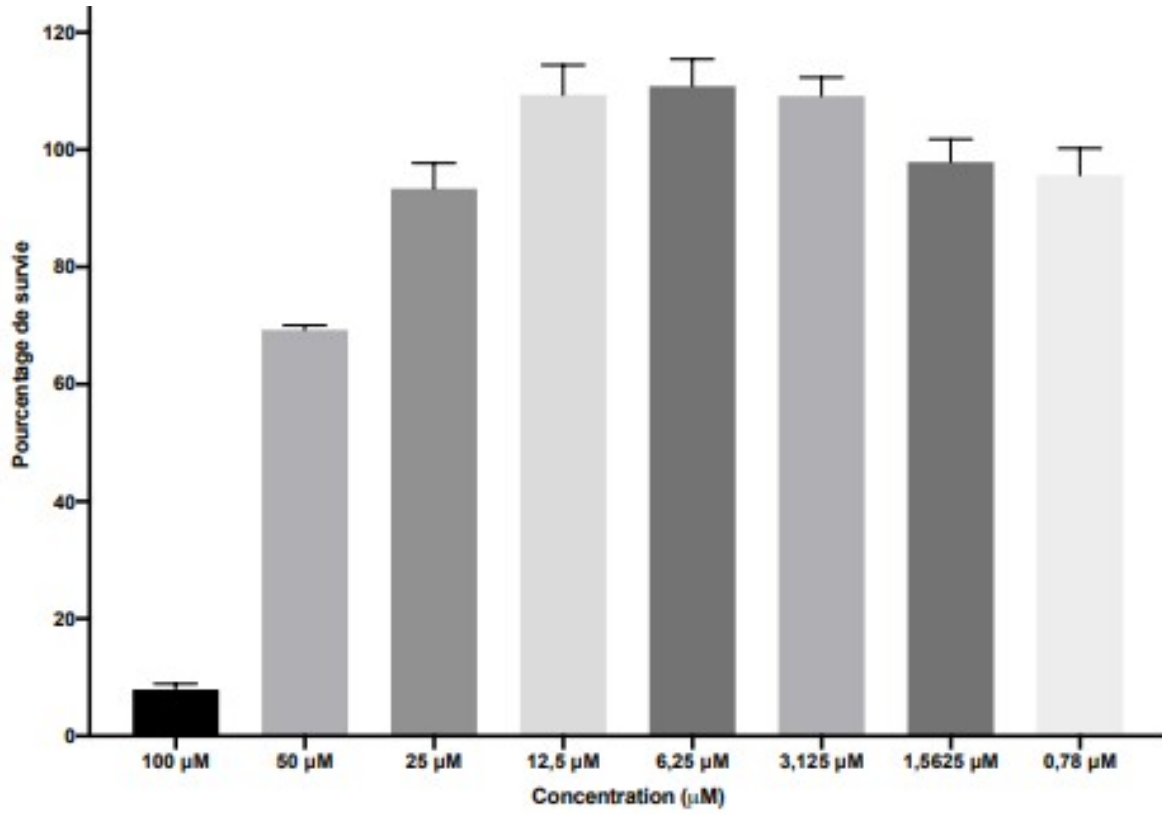

9c

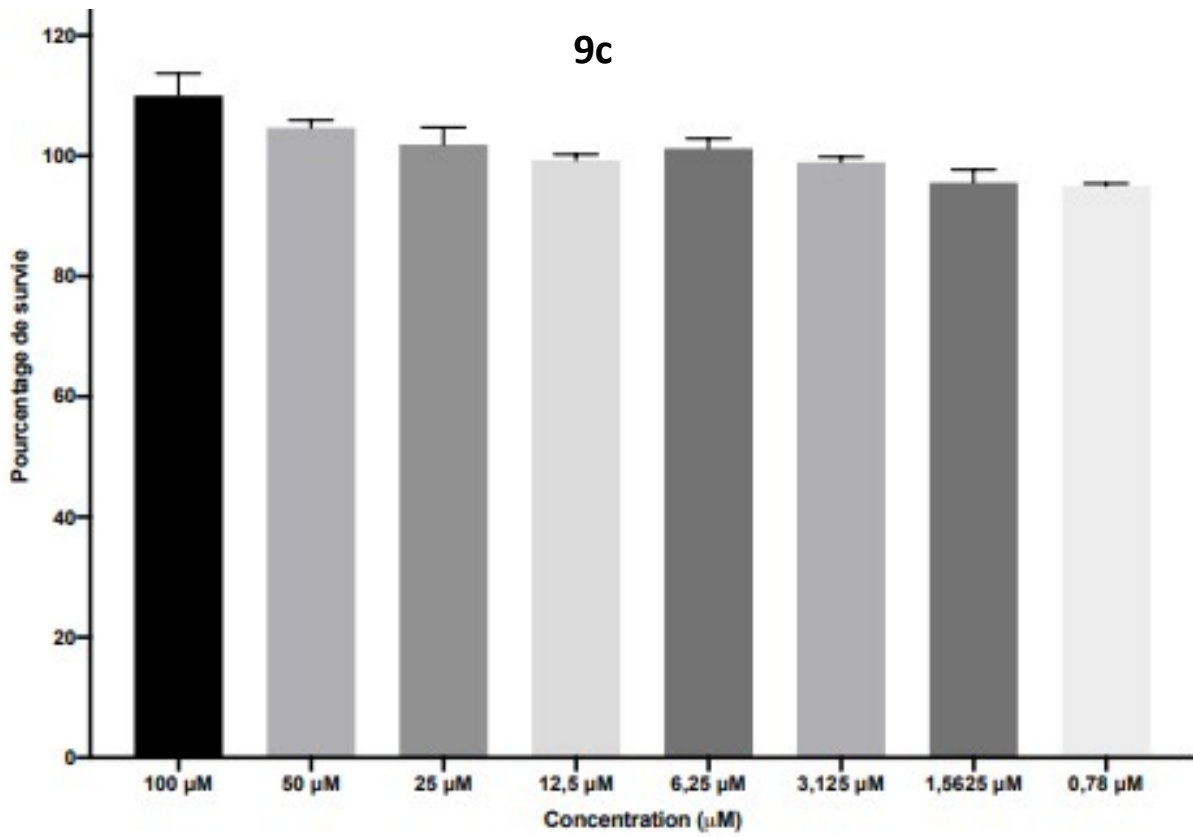

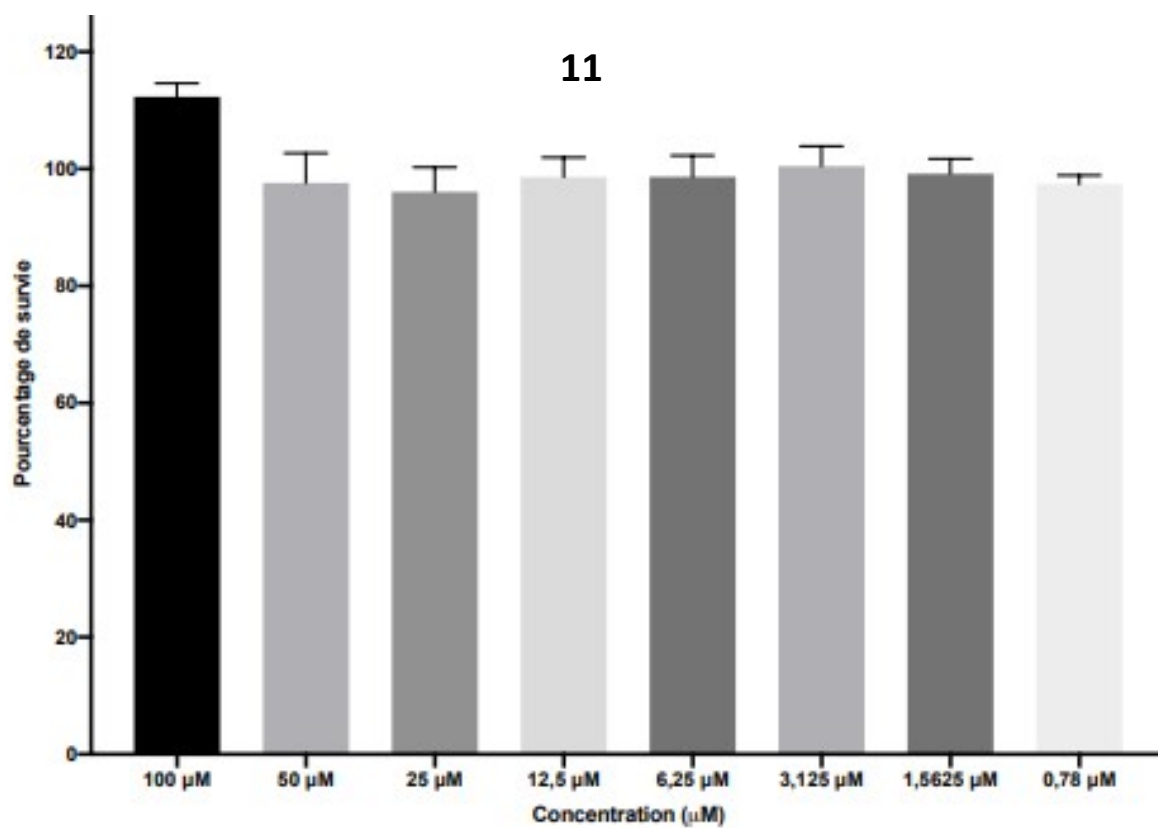

Supplement: d3md00467h2.pdf [file d3md00467h2.pdf]
