# Supplementary material for: Colorectal anticancer activity of a novel class of triazolic triarylmethane derivatives
Source: Royal Society of Chemistry journal article supplement (doi:10.1039/d3md00467h), 2023-12-04
Supplement: d3md00467h3.pdf [file d3md00467h3.pdf]

## Supplementary Information -3-

# Colorectal anti-cancer activity of a novel class of triazolic triarylmethanes derivatives

Ameni Hadj Mohamed <sup>[a] [b]</sup>, Aline Pinon <sup>[c]</sup>, Nathalie Lagarde <sup>[a]</sup>, Christophe Ricco <sup>[a]</sup>,  
Elizabeth Goya-Jorge <sup>[d]</sup>, Hadley Mouhsine <sup>[e]</sup>, Moncef Msaddek <sup>[b]</sup>, Bertrand Liagre\* <sup>[c]</sup>,  
Maité Sylla-Iyarreta Veitía\* <sup>[a]</sup>

<sup>a.</sup> Laboratoire Génomique, Bioinformatique et Chimie Moléculaire (GBCM, EA 7528)  
Conservatoire national des arts et métiers, HESAM Université, 2 rue Conté, 75003,  
Paris

<sup>b.</sup> Laboratoire de Chimie hétérocyclique, produits naturels et réactivité (LR11ES39)  
Université de Monastir Avenue de l'environnement 5019, Monastir, Tunisie

<sup>c.</sup> Univ. Limoges, LABCiS, UR 22722, Faculté de Pharmacie, F-87000 Limoges,  
France.

<sup>d.</sup> Laboratory of Immunology-Vaccinology, Faculty of Veterinary Medicine - FARAHA,  
University of Liège, Av. Cureghem 10, 4000 Liège, Belgium

<sup>e.</sup> Peptinov, Pépinière Paris Santé Cochin, Hôpital Cochin, 29 rue du Faubourg Saint  
Jacques Paris 75014

Corresponding authors: Pr. M. Sylla-Iyarreta Veitía, [maite.sylla@lecnam.net](mailto:maite.sylla@lecnam.net)

[Pr. B. Liagre, bertrand.liagre@unilim.fr](mailto:bertrand.liagre@unilim.fr)

## Predicted binding modes of compounds **9b** in the in the caspase-3 and PARP binding sites

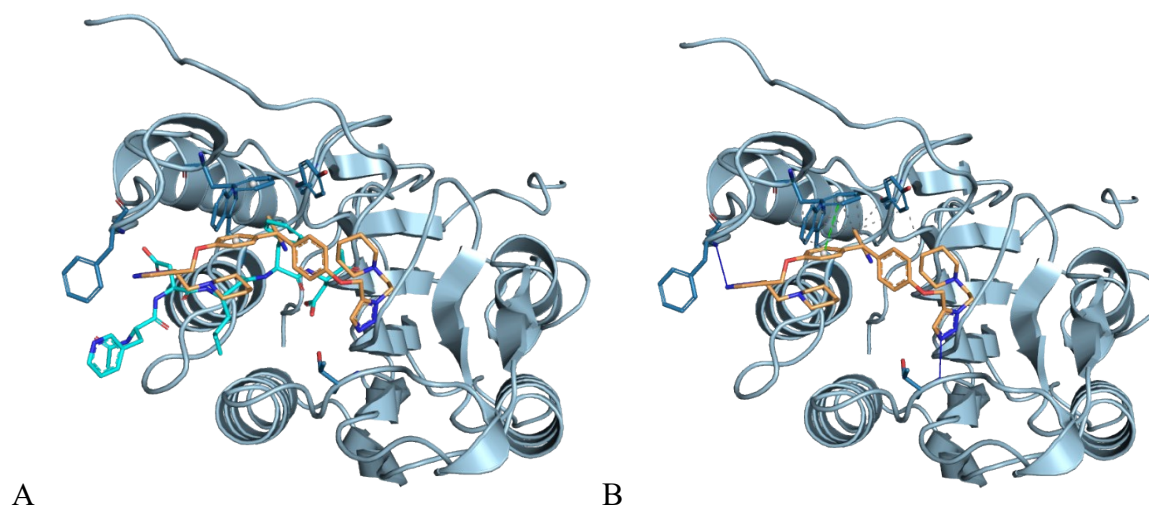

Predicted binding modes of compounds **9b** (in orange) in the caspase-3 binding site (PDB ID: 6CKZ) (A) in comparison with the 6CKZ co-crystallized ligand (in cyan) and (B) with detailed information about the interactions established with the caspase-3 binding site obtained using PLIP (blue line: hydrogen bonds; green dotted lines:  $\pi$ -stacking; grey dotted lines: hydrophobic)

| Interaction     | 6CKZ binding site residues | 6CKZ bound ligand | Compound 9b |
|-----------------|----------------------------|-------------------|-------------|
| Hydrophobic     | Y18                        | ✓                 |             |
|                 | N53                        |                   | ✓           |
|                 | Q79                        |                   | ✓           |
|                 | W80                        | ✓                 |             |
|                 | I84                        | ✓                 |             |
|                 | L210                       | ✓                 | ✓           |
|                 | L264                       | ✓                 | ✓           |
|                 | K268                       | ✓                 |             |
|                 | V270                       | ✓                 |             |
|                 | Y272                       | ✓                 | ✓           |
| D292            | ✓                          | ✓                 |             |
| Hydrogen bonds  | R200                       |                   | ✓           |
|                 | K297                       | ✓                 |             |
| $\pi$ -stacking | W80                        | ✓                 | ✓           |
| $\pi$ -cation   | R273                       | ✓                 |             |
| salt bridges    | D274                       | ✓                 | ✓           |

Detailed interactions established between the 6CKZ bound ligand or compound **9b** and the caspase 3 binding site residues (the shared interactions are colored in green).

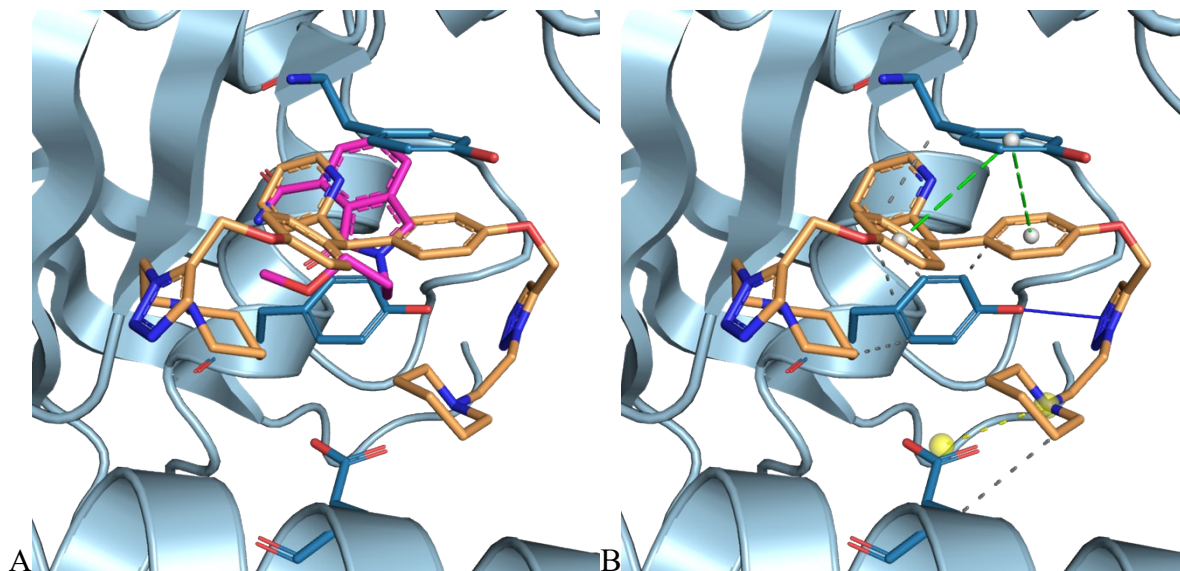

Predicted binding modes of compounds **9b** (in orange) in the PARP binding site (PDB ID: 4ZZZ) (A) in comparison with the 4ZZZ co-crystallized ligand (in magenta) and (B) with detailed information about the interactions established with the PARP binding site obtained using PLIP (blue line: hydrogen bonds; green dotted lines:  $\pi$ -stacking; grey dotted lines: hydrophobic)

| Interaction     | 4ZZZ binding site residues | 4ZZZ bound ligand | Compound 9b |
|-----------------|----------------------------|-------------------|-------------|
| Hydrophobic     | E763                       |                   | ✓           |
|                 | Y896                       | ✓                 | ✓           |
|                 | A898                       | ✓                 |             |
|                 | Y907                       | ✓                 | ✓           |
| Hydrogen bonds  | G863                       | ✓                 |             |
|                 | Y907                       |                   | ✓           |
| $\pi$ -stacking | Y896                       |                   | ✓           |
|                 | Y907                       | ✓                 |             |
| salt bridges    | G763                       |                   | ✓           |

Detailed interactions established between the 6CKZ bound ligand or compound **9b** and the caspase 3 binding site residues (the shared interactions are colored in green).
