# Supplementary material for: Colorectal anticancer activity of a novel class of triazolic triarylmethane derivatives
Source: Royal Society of Chemistry journal article supplement (doi:10.1039/d3md00467h), 2023-12-04
Supplement: d3md00467h4.pdf [file d3md00467h4.pdf]

## Supplementary data-IV- ADME predictions

### Colorectal anti-cancer activity of a novel class of triazolic triarylmethanes derivatives

Ameni Hadj Mohamed <sup>[a]</sup> <sup>[b]</sup>, Aline Pinon <sup>[c]</sup>, Nathalie Lagarde <sup>[a]</sup>, Christophe Ricco <sup>[a]</sup>, Elizabeth Goya-Jorge <sup>[d]</sup>, Hadley Mouhsine <sup>[e]</sup>, Moncef Msaddek <sup>[b]</sup>, Bertrand Liagre\* <sup>[c]</sup>, Maité Sylla-Iyarreta Veitía\* <sup>[a]</sup>

<sup>a.</sup> Laboratoire Génomique, Bioinformatique et Chimie Moléculaire (GBCM, EA 7528) Conservatoire national des arts et métiers, HESAM Université, 2 rue Conté, 75003, Paris

<sup>b.</sup> Laboratoire de Chimie hétérocyclique, produits naturels et réactivité (LR11ES39) Université de Monastir Avenue de l'environnement 5019, Monastir, Tunisie

<sup>c.</sup> Univ. Limoges, LABC*i*S, UR 22722, Faculté de Pharmacie, F-87000 Limoges, France.

<sup>d.</sup> Laboratory of Immunology-Vaccinology, Faculty of Veterinary Medicine - FARA, University of Liège, Av. Cureghem 10, 4000 Liège, Belgium

<sup>e.</sup> Peptinov, Pépinière Paris Santé Cochin, Hôpital Cochin, 29 rue du Faubourg Saint Jacques Paris 75014

Corresponding authors: Pr. M. Sylla-Iyarreta Veitía, [maite.sylla@lecnam.net](mailto:maite.sylla@lecnam.net)

[Pr. B. Liagre, bertrand.liagre@unilim.fr](mailto:bertrand.liagre@unilim.fr)

## PART 2: ADME predictions

| ID | #rot | MW      | HBD | HBA  | PlogBB | PPMDCK  | PPCaco  | PlogS   | logPo/w | RuleOfFive |
|----|------|---------|-----|------|--------|---------|---------|---------|---------|------------|
| 8a | 13   | 453.543 | 2.5 | 5.5  | -1.375 | 56.703  | 122.759 | -5.637  | 5.154   | 1          |
| 8b | 11   | 486.572 | 0.5 | 4.5  | -0.943 | 1008.17 | 1932.18 | -8.29   | 7.53    | 1          |
| 8c | 12   | 507.634 | 0.5 | 6.5  | -0.519 | 240.166 | 466.713 | -5.263  | 6.054   | 2          |
| 9a | 13   | 619.724 | 0   | 6.5  | -1.503 | 254.166 | 540.02  | -6.952  | 7.621   | 2          |
| 9b | 15   | 661.848 | 0   | 10.5 | -0.92  | 16.321  | 35.324  | -3.942  | 5.607   | 3          |
| 9c | 15   | 805.975 | 0   | 11.5 | -2.345 | 113.103 | 255.318 | -10.126 | 9.064   | 3          |

**#rot:** Number of non-trivial (not CX3), non-hindered (not alkene, amide, small ring) rotatable bonds. **Recommended: 0 – 15**

**MW:** Molecular weight of the molecule. **Recommended: 130.0 – 725.0**

**HBD:** Estimated number of hydrogen bonds that would be donated by the solute to water molecules in an aqueous solution. Values are averages taken over a number of configurations, so they can be non-integer. **Recommended: 0.0 – 6.0**

**HBA:** Estimated number of hydrogen bonds that would be accepted by the solute from water molecules in an aqueous solution. Values are averages taken over a number of configurations, so they can be non-integer. **Recommended: 2.0 – 20.0**

**PlogBB:** Predicted brain/blood partition coefficient. Note: QikProp predictions are for orally delivered drugs so, for example, dopamine and serotonin are CNS negative because they are too polar to cross the blood-brain barrier. **Recommended: -3.0 – 1.2**

**PPMDCK:** Predicted apparent MDCK cell permeability in nm/sec. MDCK cells are considered to be a good mimic for the blood-brain barrier. QikProp predictions are for non-active transport. **Recommended: <25 poor, >500 great.**

**PPCaco:** Predicted apparent Caco-2 cell permeability in nm/sec. Caco-2 cells are a model for the gut-blood barrier. QikProp predictions are for non-active transport. **Recommended: <25 poor, >500 great**

**PlogS:** Predicted aqueous solubility, log S. S in mol dm<sup>-3</sup> is the concentration of the solute in a saturated solution that is in equilibrium with the crystalline solid. **Recommended: -6.5 – 0.5**

**logPo/w:** Predicted octanol/water partition coefficient. **Recommended: -2.0 – 6.5**

**RuleOfFive:** Number of violations of Lipinski's rule of five. The rules are:  $\text{mol\_MW} < 500$ ,  $\text{QPlogPo/w} < 5$ ,  $\text{donorHB} \leq 5$ ,  $\text{accptHB} \leq 10$ . Compounds that satisfy these rules are considered drug-like. (The "five" refers to the limits, which are multiples of 5.) **Recommended: maximum is 4**

## References

- [1] C. Ricco, F. Abdmouleh, C. Riccobono, L. Guenineche, F. Martin, E. Goya-Jorge, N. Lagarde, B. Liagre, M. Ben Ali, C. Ferroud, M. El Arbi, M.S.I. Veitía, Pegylated triarylmethanes: Synthesis, antimicrobial activity, anti-proliferative behavior and in silico studies, *Bioorg. Chem.* 96 (2020) 103591. <https://doi.org/10.1016/j.bioorg.2020.103591>.
- [2] R. Berscheid, F. Vögtle, Z. Nieger, Mehrfach verbrückte Triphenylmethane, *Chem. Ber.* 125 (1992) 1687–1695. <https://doi.org/10.1002/cber.19921250726>.
- [3] N.C. Habermehl, F. Mohr, D.J. Eisler, M.C. Jennings, R.J. Puddephatt, Organogold(I) macrocycles and [2]catenanes containing pyridyl and bipyridyl substituents - Organometallic catenanes as ligands, *Can. J. Chem.* 84 (2006) 111–123. <https://doi.org/10.1139/V05-229>.
- [4] A. Nagy, B. Csordás, V. Zsoldos-Mády, I. Pintér, V. Farkas, A. Perczel, C-3 epimers of sugar amino acids as foldameric building blocks: improved synthesis, useful derivatives, coupling strategies, *Amino Acids.* 49 (2017) 223–240. <https://doi.org/10.1007/s00726-016-2346-5>.
- [5] A. Mukherji, R.B. Addanki, S. Halder, P.K. Kancharla, Sterically Strained Brønsted Pair Catalysis by Bulky Pyridinium Salts: Direct Stereoselective Synthesis of 2-Deoxy and 2,6-Dideoxy- $\beta$ -thioglycosides from Glycals, *J. Org. Chem.* 86 (2021) 17226–17243. <https://doi.org/10.1021/acs.joc.1c02305>.
- [6] S. Ferreira, A.C.R. Sodero, M.F.C. Cardoso, E.S. Lima, C.R. Kaiser, F.P. Silva, V.F. Ferreira, Synthesis, Biological Activity, and Molecular Modeling Studies of 1H-1,2,3-Triazole Derivatives of Carbohydrates as  $\alpha$ -Glucosidases Inhibitors, *J. Med. Chem.* 53 (2010) 2364–2375. <https://doi.org/10.1021/jm901265h>.
- [7] A.P. Wang, C. Liu, S. Yang, Z. Zhao, P. Lei, An efficient method to synthesize novel 5-O-(6'-modified)-mycaminose 14-membered ketolides, *Tetrahedron.* 72 (2016) 285–297. <https://doi.org/10.1016/j.tet.2015.11.029>.
- [8] Z.-G. Gao, H.T. Duong, T. Sonina, S.-K. Kim, P. Van Rompaey, S. Van Calenbergh, L. Mamedova, H.O. Kim, M.J. Kim, A.Y. Kim, B.T. Liang, L.S. Jeong, K.A. Jacobson, Orthogonal Activation of the Reengineered A3 Adenosine Receptor (Neoeceptor) Using Tailored Nucleoside Agonists, *J. Med. Chem.* 49 (2006) 2689–2702. <https://doi.org/10.1021/jm050968b>.
- [9] L.R. Comstock, J.M. Denu, Synthesis and biochemical evaluation of O-acetyl-ADP-ribose and N-acetyl analogs, *Org. Biomol. Chem.* 5 (2007) 3087–3091. <https://doi.org/10.1039/b710231c>.
- [10] X.P. He, Y.L. Zeng, Y. Zang, J. Li, R.A. Field, G.R. Chen, Carbohydrate CuAAC click chemistry for therapy and diagnosis, *Carbohydr. Res.* 429 (2016) 1–22. <https://doi.org/10.1016/j.carres.2016.03.022>.
